# Supplementary material for: Large-scale single-nuclei profiling identifies role for ATRNL1 in atrial fibrillation
Source: PubMed Central journal article supplement — Nat Commun. 2024 Nov 19;15:10002. doi: 10.1038/s41467-024-54296-w (PMC11576987; doi:10.1038/s41467-024-54296-w), 2024-11-19
Supplement: 41467_2024_54296_MOESM3_ESM.pdf [file 41467_2024_54296_MOESM3_ESM.pdf]

## Legends for all supplementary data

**Supplemental Data 1:** Baseline characteristics table of patients included for single nuclei RNA-sequencing.

**Supplemental Data 2:** Clinical characteristics of patients included for single nuclei RNA-sequencing.

**Supplemental Data 3:** Marker genes for all global cell types identified with single nuclei RNA-sequencing. Area under the receiver operating characteristic curve is calculated comparing nuclei-level expression between cell types. Log fold-change estimates and two-sided p-values are calculated using the limma-voom differential expression analysis between cell types and corrected for multiple testing with the Benjamini-Hochberg procedure.

**Supplemental Data 4:** Differentially expressed genes between AF and CTRL samples, by global cell type calculated using the limma-voom differential expression analysis. Two-sided p-values were calculated for each gene and corrected for multiple testing using the Benjamini-Hochberg correction.

**Supplemental Data 5:** Differential expression analysis comparing *ATRNL1* siRNA-1 versus control scramble siRNA treatment. Two-sided p-values were calculated using DEseq2 for each gene and corrected for multiple testing using the Benjamini-Hochberg correction.

**Supplemental Data 6:** Differential expression analysis comparing *ATRNL1* siRNA-2 versus control scramble siRNA treatment. Two-sided p-values were calculated using DEseq2 for each gene and corrected for multiple testing using the Benjamini-Hochberg correction.

**Supplemental Data 7:** Differential expression analysis comparing *ATRNL1-OE* versus control lentivirus treatment. Two-sided p-values were calculated using DEseq2 for each gene and corrected for multiple testing using the Benjamini-Hochberg correction.

**Supplemental Data 8:** Comparison of significant differentially expressed genes identified from *ATRNL1* siRNA-1 and *ATRNL1* siRNA-2. All values obtained from Supplemental Table 5 and Supplemental Table 6. Adjusted P-value < 0.05 and Log2 fold change > 0.5.

**Supplemental Data 9:** Comparison of significant differentially expressed genes identified from *ATRNL1* siRNA-2 and *ATRNL1-OE*. All values obtained from Supplemental Table 6 and Supplemental Table 7. Adjusted P-value < 0.05 and Log2 fold change > 0.5.

**Supplemental Data 10:** Target gene prediction network of miRNAs with significant binding scores to *circATRNL1*, as identified using ScanMiR.

**Supplemental Data 11:** Venn diagram results from the intersection of TargetScan and miRTarBase with the combined differentially expressed genes from *ATRNL1* siRNA-2 and *ATRNL1*-OE treatments.

**Supplemental Data 12:** Sample quality control metrics for snRNA-seq.
